# Supplementary material
Source: publisher figshare collection journal article supplement (https://gsapubs.figshare.com/ndownloader/files/34171788)
Supplement: Supplementary file 1 [file 34171788]

## Sheet: Table S7
Supplementary Table S7. U–Pb isotope compositions of apatite from the leucogranites and phengite gneisses, together with the results for U–Pb reference materials.
#	Group	Spot No.	U (ppm)	Th (ppm)	Th/U	f207 (%)	238U/206Pb	± 2σ	207Pb/206Pb	± 2σ	206Pb/238U Age (Ma)	± 2σ	207Pb/206Pb Age (Ma)	± 2σ	Disc. (%)
Leucogranite YK173-10a
1	M	YK173-10a - 43	121.806	168.544	1.38371	69.1037	9.89521	0.399023	0.634857	0.0368289	620.612	23.8593	4589.23	83.94	86.4768
2	M	YK173-10a - 8	58.5256	57.9945	0.990927	78.8442	6.77577	0.278185	0.723864	0.0422224	887.41	34.0373	4778.19	83.6268	81.4279
3	M	YK173-10a - 15	58.4031	58.329	0.998732	80.9389	6.10503	0.265934	0.747316	0.0471788	977.856	39.5225	4823.85	90.3176	79.7287
4	M	YK173-10a - 59	54.8273	56.3509	1.02779	84.2884	5.03191	0.246656	0.761022	0.0514396	1168.5	52.388	4849.84	96.5847	75.9063
5	M	YK173-10a - 23	67.007	64.9072	0.968663	85.2991	4.7079	0.209889	0.759711	0.0480624	1241.64	50.3516	4847.38	90.4095	74.3853
6	M	YK173-10a - 37	54.7686	53.7716	0.981797	85.6693	4.58912	0.210753	0.755965	0.0491396	1270.8	52.9698	4840.31	92.9241	73.7454
7	M	YK173-10a - 14	45.2538	38.9376	0.860428	86.1181	4.4459	0.238311	0.777104	0.0607896	1307.85	63.4522	4879.7	111.625	73.1981
8	M	YK173-10a - 27	66.4557	66.2239	0.996513	86.7687	4.23754	0.173768	0.782603	0.044904	1365.8	50.4728	4889.76	81.8384	72.0682
9	M	YK173-10a - 7	49.4973	33.6204	0.679237	87.3788	4.04178	0.186472	0.775196	0.0514383	1425.13	58.991	4876.19	94.7016	70.7736
10	M	YK173-10a - 55	53.9307	58.6722	1.08792	87.701	3.93868	0.188989	0.780782	0.0527807	1458.52	62.6336	4886.44	96.4328	70.1517
11	M	YK173-10a - 46	40.9257	45.3918	1.10913	87.8652	3.88701	0.16491	0.819308	0.0508341	1475.85	55.9651	4955.04	88.2361	70.2152
12	M	YK173-10a - 24	71.5743	75.7707	1.05863	89.265	3.43765	0.138082	0.790522	0.0451532	1646.01	58.3513	4904.11	81.4152	66.4362
13	M	YK173-10a - 48	37.0577	30.479	0.822474	89.5861	3.3351	0.148617	0.803193	0.0503809	1690.52	66.2662	4926.77	89.3168	65.6871
14	M	YK173-10a - 53	34.6709	32.791	0.945779	90.4891	3.04593	0.162448	0.812595	0.0652631	1830.17	84.9807	4943.33	114.277	62.977
15	M	YK173-10a - 4	40.0382	34.2008	0.854203	90.5251	3.03435	0.12514	0.81104	0.0479926	1836.25	65.9008	4940.61	84.2073	62.8336
16	M	YK173-10a - 65	41.417	41.4946	1.00187	91.1757	2.82537	0.118225	0.797577	0.0479082	1953.36	70.5171	4916.77	85.5698	60.2714
17	M	YK173-10a - 6	55.4381	54.0959	0.975788	91.288	2.79008	0.110601	0.819454	0.046484	1974.64	67.4256	4955.29	80.6701	60.1508
18	M	YK173-10a - 31	50.7349	49.4797	0.975259	92.0263	2.55344	0.132652	0.819558	0.0622714	2130.38	94.2515	4955.47	108.054	57.0095
19	M	YK173-10a - 42	35.0071	29.1346	0.832248	92.4136	2.42941	0.108327	0.823012	0.0524012	2222.34	83.8226	4961.45	90.521	55.2079
20	M	YK173-10a - 44	29.3649	19.6576	0.669423	93.8759	1.96129	0.100135	0.843765	0.0600354	2656.06	111.154	4996.83	101	46.845
21	M	YK173-10a - 41	31.9686	29.2245	0.914164	93.9084	1.95046	0.103212	0.830512	0.0624614	2668.15	115.629	4974.35	106.864	46.3619
22	M	YK173-10a - 67	25.2946	19.9748	0.789689	94.0835	1.89465	0.140981	0.839609	0.0907737	2732.19	165.748	4989.82	153.516	45.2447
23	M	YK173-10a - 66	17.6867	18.1057	1.02369	95.2452	1.52225	0.256463	0.84057	0.199105	3255.19	431.235	4991.44	336.315	34.7847
24	M	YK173-10a - 21	10.7679	1.36705	0.126956	96.4724	1.12976	0.0532828	0.8669	0.0581798	4087.05	142.777	5035.19	95.1068	18.8304
25	M	YK173-10a - 2	9.15422	1.06083	0.115885	97.0353	0.949192	0.0580133	0.863131	0.0757611	4638.57	202.199	5029.02	124.421	7.76382
26	M	YK173-10a - 64	10.5281	1.95028	0.185246	97.0913	0.931816	0.052933	0.88614	0.0703786	4699.95	189.615	5066.28	112.4	7.23068
27	M	YK173-10a - 63	13.0807	5.87323	0.448998	97.1103	0.925398	0.0577421	0.870929	0.0791913	4723.06	208.984	5041.76	128.819	6.32134
28	M	YK173-10a - 40	7.09865	1.11459	0.157015	97.6773	0.744045	0.0320496	0.885832	0.0533524	5491.45	159.247	5065.79	85.2389	-8.4026
29	M	YK173-10a - 33	6.73699	1.12943	0.167645	97.917	0.66692	0.0317966	0.874679	0.0592192	5905.32	184.429	5047.85	95.8926	-16.9868
30	M	YK173-10a - 45	8.46879	1.12521	0.132865	98.1103	0.605184	0.0326426	0.881846	0.0695254	6288.22	216.697	5059.4	111.611	-24.2878
31	M	YK173-10a - 47	5.39339	0.954358	0.176949	98.4098	0.50905	0.025196	0.877784	0.0607086	7005.25	211.515	5052.87	97.9354	-38.639
32	M	YK173-10a - 32	5.64391	1.30467	0.231164	98.5476	0.463772	0.0333641	0.860818	0.0864887	7409.37	317.08	5025.21	142.444	-47.4438
33	M	YK173-10a - 13	8.62631	2.60786	0.302315	98.6204	0.441805	0.0290455	0.885227	0.0827651	7624.7	294.144	5064.82	132.326	-50.5424
34	M	YK173-10a - 70	4.25559	0.587085	0.137956	98.6261	0.439196	0.0298708	0.869423	0.0792896	7651.22	304.867	5039.31	129.216	-51.8306
35	M	YK173-10a - 68	5.27418	1.09306	0.207247	98.6349	0.436576	0.028302	0.872533	0.0775442	7678.03	291.1	5044.37	125.894	-52.21
36	M	YK173-10a - 34	2.96502	0.192107	0.0647909	99.3355	0.212699	0.0154854	0.889888	0.0934956	11221.5	387.478	5072.25	148.652	-121.232
37	I	YK173-10a - 5	136.35	172.242	1.26323	53.6744	14.8363	0.617918	0.483428	0.0294839	420.487	16.954	4190.79	90.1587	89.9664
38	I	YK173-10a - 62	142.535	168.941	1.18526	68.6612	10.0369	0.410972	0.631394	0.037485	612.252	23.9157	4581.31	85.938	86.6359
39	I	YK173-10a - 17	106.959	136.179	1.27318	72.3901	8.84281	0.359043	0.66797	0.0398819	690.646	26.5924	4662.66	86.0779	85.1877
40	I	YK173-10a - 51	113.041	131.57	1.16391	75.0224	7.99961	0.326713	0.684819	0.0406529	759.313	29.2546	4698.54	85.4336	83.8394
41	I	YK173-10a - 12	71.7556	77.5273	1.08044	76.7517	7.44578	0.308114	0.700111	0.0420625	812.373	31.5852	4730.3	86.333	82.8262
42	I	YK173-10a - 1	84.2821	100.536	1.19285	79.784	6.47438	0.265218	0.717164	0.0418825	925.888	35.3307	4764.85	83.7812	80.5684
43	I	YK173-10a - 3	83.3781	91.4746	1.09711	81.6516	5.87612	0.23768	0.728712	0.0417189	1013.1	37.9213	4787.76	82.0428	78.8397
44	I	YK173-10a - 38	98.7885	130.259	1.31856	82.3486	5.65344	0.222373	0.754669	0.043045	1049.93	38.1107	4837.86	81.5482	78.2977
45	I	YK173-10a - 19	104.147	122.537	1.17658	84.2043	5.05875	0.20111	0.757107	0.0428256	1162.83	42.2993	4842.47	80.854	75.9868
46	I	YK173-10a - 71	64.1395	74.6942	1.16456	84.3349	5.01694	0.228406	0.759215	0.0478838	1171.69	48.7774	4846.44	90.1363	75.8237
47	I	YK173-10a - 25	69.9585	72.0257	1.02955	84.6131	4.9281	0.201874	0.771724	0.0444383	1190.98	44.5462	4869.78	82.2063	75.5436
48	I	YK173-10a - 28	68.8487	69.1086	1.00378	84.626	4.92389	0.203345	0.767803	0.0458078	1191.91	44.941	4862.51	85.2008	75.4878
49	I	YK173-10a - 50	74.9879	78.0357	1.04064	85.3621	4.688	0.212599	0.768924	0.0498926	1246.43	51.3976	4864.59	92.6544	74.3775
50	I	YK173-10a - 11	76.1995	84.0924	1.10358	85.3662	4.68675	0.190148	0.771765	0.0443267	1246.73	45.9919	4869.86	81.9953	74.399
51	I	YK173-10a - 35	97.6103	106.154	1.08752	85.6431	4.59808	0.181233	0.774212	0.0437148	1268.56	45.3886	4874.38	80.5912	73.975
52	I	YK173-10a - 16	68.5455	70.1355	1.0232	85.8641	4.52712	0.209245	0.770536	0.052294	1286.58	53.909	4867.58	96.8975	73.5684
53	I	YK173-10a - 57	76.5424	83.7714	1.09444	86.3945	4.3577	0.17726	0.792342	0.0456967	1331.77	48.944	4907.39	82.1936	72.8621
54	I	YK173-10a - 61	67.3764	67.5708	1.00289	87.0754	4.13944	0.166986	0.790625	0.0461004	1394.9	50.5999	4904.3	83.1115	71.5577
55	I	YK173-10a - 30	64.8937	66.6235	1.02666	87.9581	3.85619	0.160569	0.778651	0.0450456	1486.38	55.2761	4882.54	82.5403	69.5572
56	I	YK173-10a - 54	84.7811	88.1734	1.04001	88.0426	3.82968	0.153674	0.798221	0.0447978	1495.56	53.561	4917.92	79.9454	69.5896
57	I	YK173-10a - 18	73.0535	74.1784	1.0154	88.0538	3.82605	0.152252	0.797114	0.0446493	1496.83	53.1557	4915.95	79.7982	69.5516
58	I	YK173-10a - 56	91.2714	101.658	1.11379	88.7354	3.60755	0.141707	0.795395	0.0443503	1577.23	54.9587	4912.87	79.446	67.896
59	I	YK173-10a - 52	71.2725	86.2894	1.2107	89.9141	3.22981	0.128994	0.797661	0.0443389	1738.82	60.87	4916.93	79.1856	64.6361
60	I	YK173-10a - 69	69.3014	71.746	1.03527	90.2529	3.1214	0.125518	0.803545	0.0456069	1791.53	62.8992	4927.39	80.8157	63.6414
61	I	YK173-10a - 9	48.4551	44.7937	0.924438	90.3571	3.0884	0.125078	0.81828	0.0466039	1808.22	63.8594	4953.25	81.0014	63.4943
62	I	YK173-10a - 29	65.5829	65.4426	0.997861	90.5525	3.02554	0.119603	0.810366	0.0459932	1840.9	63.3062	4939.43	80.7706	62.7305
63	I	YK173-10a - 26	49.6271	47.1786	0.950663	91.4283	2.74467	0.113117	0.805593	0.0461831	2002.72	70.9511	4931.02	81.6153	59.3852
64	I	YK173-10a - 36	27.4579	17.5625	0.639614	94.459	1.77463	0.0862242	0.850985	0.0588548	2881.06	112.896	5008.92	98.1218	42.4814
Phengite gneiss YK173-10b
65	M	YK173-10b - 52	38.8284	74.8298	1.92719	86.5762	4.29903	0.19186	0.775682	0.0480486	1348.17	54.2932	4877.09	88.4018	72.3571
66	M	YK173-10b - 55	43.1725	64.3449	1.49041	86.6718	4.26882	0.185723	0.791233	0.0490197	1356.77	53.2319	4905.4	88.3023	72.3413
67	M	YK173-10b - 45	19.7423	41.916	2.12316	88.6908	3.62168	0.168316	0.790193	0.0506855	1571.77	64.8258	4903.52	91.4311	67.9462
68	M	YK173-10b - 39	25.6296	21.5001	0.838875	89.8487	3.25057	0.142203	0.791569	0.0489657	1729.07	66.3491	4906	88.1652	64.7559
69	M	YK173-10b - 70	14.6629	15.918	1.0856	90.7823	2.95199	0.225816	0.812984	0.084306	1880.67	124.795	4944.02	147.546	61.9606
70	M	YK173-10b - 64	44.809	58.6697	1.30933	91.8952	2.59574	0.109465	0.83002	0.0494398	2100.74	75.6069	4973.5	84.6391	57.7613
71	M	YK173-10b - 44	21.5367	6.00169	0.278672	92.0749	2.53779	0.109775	0.817254	0.0501194	2141.56	78.8238	4951.47	87.228	56.7491
72	M	YK173-10b - 50	20.972	18.7184	0.892542	92.4522	2.41714	0.11334	0.826922	0.0528811	2231.87	88.4635	4968.19	90.891	55.0767
73	M	YK173-10b - 43	21.6614	33.2272	1.53393	92.8541	2.28872	0.0961839	0.840415	0.0495727	2336.86	82.3806	4991.18	83.7514	53.1802
74	M	YK173-10b - 15	26.8791	8.38457	0.311936	93.5848	2.05478	0.0859777	0.85117	0.0525117	2556.25	88.3051	5009.23	87.5266	48.9691
75	M	YK173-10b - 66	21.5413	42.0329	1.95127	93.6894	2.02101	0.102844	0.840781	0.060683	2591.42	108.597	4991.8	102.475	48.0865
76	M	YK173-10b - 46	13.5042	6.17566	0.457315	94.3573	1.80725	0.0835866	0.852071	0.056654	2839	106.217	5010.73	94.325	43.3416
77	M	YK173-10b - 65	10.5465	3.63207	0.344386	95.8089	1.34263	0.0702344	0.879111	0.0687802	3588.35	143.972	5055.01	110.779	29.014
78	M	YK173-10b - 42	10.9527	1.91397	0.174749	96.0762	1.25688	0.0627697	0.873369	0.0616332	3773.41	142.671	5045.73	99.9605	25.2156
79	M	YK173-10b - 2	30.6883	70.1594	2.28619	96.1798	1.22298	0.0504967	0.850636	0.048531	3852.11	119.75	5008.34	80.9454	23.0862
80	M	YK173-10b - 59	8.20008	3.29543	0.401878	97.1174	0.923022	0.0543346	0.867568	0.0729279	4731.67	197.394	5036.29	119.118	6.04842
81	M	YK173-10b - 60	4.27193	5.19216	1.21541	98.4445	0.498257	0.0453515	0.888852	0.114865	7097.13	392.108	5070.6	182.854	-39.9661
82	M	YK173-10b - 27	3.61035	1.03635	0.287051	98.9722	0.329276	0.016959	0.899574	0.0659459	8995.92	249.896	5087.56	103.653	-76.8218
83	M	YK173-10b - 40	2.73841	0.236453	0.0863469	99.3839	0.196577	0.00968458	0.880874	0.0617665	11643.3	265.565	5057.84	99.2713	-130.203
84	M	YK173-10b - 68	1.87076	0.0815392	0.0435862	99.4534	0.174955	0.00944501	0.9061	0.0696633	12276.9	296.401	5097.78	108.66	-140.829
85	M	YK173-10b - 53	1.61995	0.195708	0.120812	99.5833	0.133464	0.0140221	0.895479	0.129409	13790.2	599.249	5081.11	204.39	-171.401
86	M	YK173-10b - 51	0.521405	0.076606	0.146922	99.7944	0.0653286	0.00763447	0.9072	0.152364	17995.9	710.005	5099.5	237.351	-252.895
87	I	YK173-10b - 7	41.5899	51.9425	1.24892	86.6328	4.28113	0.17913	0.783461	0.0471422	1353.25	51.0752	4891.32	85.8174	72.3336
88	I	YK173-10b - 14	39.1043	22.7635	0.582122	88.7908	3.58945	0.158539	0.784846	0.0478482	1584.28	62.041	4893.84	86.9388	67.6271
89	I	YK173-10b - 72	38.0986	45.6209	1.19744	89.0436	3.50922	0.145828	0.812551	0.0467709	1616.31	59.4098	4943.26	81.9014	67.3027
90	I	YK173-10b - 33	38.0521	45.5819	1.19788	89.0502	3.50707	0.156102	0.811199	0.0509641	1617.19	63.6652	4940.89	89.4025	67.2693
91	I	YK173-10b - 58	50.25	96.3176	1.91677	90.3394	3.09357	0.12931	0.801068	0.0464781	1805.59	65.8269	4923	82.6304	63.3234
92	I	YK173-10b - 3	28.9832	19.5334	0.673955	90.3902	3.07767	0.127728	0.81325	0.0480638	1813.72	65.6124	4944.48	84.0886	63.3184
93	I	YK173-10b - 30	24.5328	9.19539	0.37482	90.628	3.00124	0.152829	0.806374	0.0584431	1853.85	82.0454	4932.4	103.175	62.4147
94	I	YK173-10b - 31	41.9004	24.1726	0.576906	91.123	2.8428	0.116793	0.814368	0.0474691	1943.02	68.9218	4946.43	82.9269	60.7187
95	I	YK173-10b - 21	45.7783	61.0437	1.33347	91.8686	2.60393	0.102833	0.818277	0.0465532	2095.1	70.6418	4953.25	80.9136	57.7024
96	I	YK173-10b - 12	24.8933	16.5619	0.665315	92.3378	2.45399	0.103508	0.83272	0.0497194	2203.48	78.726	4978.12	84.8244	55.7367
97	I	YK173-10b - 4	50.2666	65.2163	1.29741	92.8303	2.29575	0.090301	0.820374	0.0463845	2330.86	76.9402	4956.89	80.4015	52.9774
98	I	YK173-10b - 8	32.9513	74.6221	2.26462	93.9304	1.94392	0.0804282	0.847028	0.0504421	2675.49	90.6048	5002.31	84.5136	46.5149
99	I	YK173-10b - 29	37.9417	48.1084	1.26796	93.9525	1.93682	0.0783359	0.845615	0.0480218	2683.52	88.7854	4999.94	80.6014	46.329
100	I	YK173-10b - 1	38.9212	77.8828	2.00104	94.2314	1.84727	0.0760925	0.841203	0.0488149	2789.05	93.2678	4992.51	82.3892	44.1353
101	I	YK173-10b - 38	35.8017	88.1693	2.46272	94.2719	1.83453	0.0746503	0.849236	0.0481848	2804.76	92.5497	5006	80.5088	43.972
102	I	YK173-10b - 25	13.8497	6.85528	0.494976	94.7654	1.67598	0.0878202	0.837371	0.0628295	3016.4	126.246	4986.03	106.558	39.503
103	I	YK173-10b - 35	35.6408	60.2394	1.69018	95.5115	1.4369	0.0568261	0.840938	0.0475149	3405.25	104.626	4992.06	80.2218	31.7867
104	I	YK173-10b - 17	16.5312	12.9706	0.78461	95.9128	1.30899	0.0650194	0.862623	0.0634384	3658.7	138.699	5028.18	104.249	27.2362
105	I	YK173-10b - 63	11.1896	2.39384	0.213935	96.7396	1.04389	0.0455867	0.860283	0.0536873	4331.35	137.756	5024.33	88.4798	13.7926
106	I	YK173-10b - 49	5.83483	0.672069	0.115182	98.7495	0.400644	0.0194184	0.897824	0.0609136	8068.42	223.161	5084.81	95.9413	-58.6769
107	I	YK173-10b - 54	1.31755	0.0710786	0.0539475	99.4731	0.168245	0.0106057	0.884779	0.0775679	12492.1	348.178	5064.11	124.084	-146.679
108	I	YK173-10b - 28	0.945084	0.0750474	0.0794082	99.7436	0.0807296	0.0117138	0.883506	0.180876	16723.8	870.757	5062.07	289.785	-230.376
Leucogranite YK1711-1a
109	M	YK1711-1a - 54	69.9551	77.4171	1.10667	76.162	7.63434	0.310174	0.684089	0.039212	793.494	30.3338	4697.01	82.4996	83.1064
110	M	YK1711-1a - 66	78.422	79.4174	1.01269	77.8159	7.10502	0.288133	0.712629	0.0415761	848.877	32.2548	4755.75	83.7338	82.1505
111	M	YK1711-1a - 8	40.3889	32.8802	0.81409	78.2136	6.97824	0.40117	0.738925	0.0631786	863.311	46.4517	4807.69	122.413	82.0431
112	M	YK1711-1a - 69	59.7273	53.0413	0.888058	78.4829	6.89166	0.333568	0.727817	0.0513287	873.454	39.5381	4786	101.073	81.7498
113	M	YK1711-1a - 25	54.9832	40.0464	0.728339	81.5777	5.90069	0.252259	0.763035	0.046272	1009.2	39.937	4853.61	86.6376	79.2072
114	M	YK1711-1a - 59	64.1675	49.6169	0.773239	81.8203	5.82211	0.252624	0.731446	0.0446008	1021.8	41.0015	4793.12	87.3603	78.682
115	M	YK1711-1a - 22	58.1186	35.455	0.610046	81.9802	5.77136	0.25259	0.748973	0.0472205	1030.1	41.6665	4827.02	90.1842	78.6597
116	M	YK1711-1a - 28	60.3544	79.3209	1.31425	82.4956	5.60569	0.231919	0.731911	0.042078	1058.17	40.375	4794.03	82.3629	77.9273
117	M	YK1711-1a - 11	74.5536	58.0328	0.778404	82.5498	5.58874	0.221309	0.747222	0.0421977	1061.13	38.7441	4823.67	80.7929	78.0015
118	M	YK1711-1a - 57	67.6751	80.608	1.1911	82.612	5.56898	0.226318	0.754016	0.0439606	1064.6	39.8813	4836.62	83.3595	77.9887
119	M	YK1711-1a - 55	69.7936	57.2634	0.820467	82.8063	5.50645	0.227709	0.744499	0.0435565	1075.74	40.9721	4818.45	83.7197	77.6746
120	M	YK1711-1a - 47	72.8485	60.5077	0.830595	83.5586	5.26595	0.209825	0.767156	0.0441827	1120.83	40.9937	4861.31	82.2521	76.9439
121	M	YK1711-1a - 7	53.4867	45.1039	0.843274	84.1212	5.08576	0.243293	0.772136	0.0526963	1157.18	50.6741	4870.55	97.4274	76.2413
122	M	YK1711-1a - 70	58.3494	38.6999	0.663244	84.6922	4.90236	0.206275	0.756775	0.0445155	1196.68	45.9558	4841.84	84.0838	75.2845
123	M	YK1711-1a - 68	62.9019	49.5427	0.787619	84.8395	4.85536	0.211	0.764087	0.0472261	1207.25	47.8447	4855.58	88.2941	75.1369
124	M	YK1711-1a - 24	35.9929	15.3096	0.425351	85.3186	4.70167	0.197141	0.760508	0.0472854	1243.14	47.4077	4848.87	88.8486	74.3624
125	M	YK1711-1a - 58	72.6216	70.3736	0.969046	85.5962	4.61256	0.188933	0.755634	0.0437809	1264.94	47.0467	4839.68	82.8294	73.8632
126	M	YK1711-1a - 42	66.6642	71.2012	1.06806	85.6788	4.58646	0.18218	0.7689	0.0435089	1271.47	45.8363	4864.55	80.8021	73.8625
127	M	YK1711-1a - 63	68.1181	53.2049	0.781069	85.7338	4.56891	0.198356	0.77116	0.0482347	1275.9	50.2563	4868.74	89.2989	73.794
128	M	YK1711-1a - 46	53.7134	31.4265	0.585077	85.964	4.49527	0.182037	0.776116	0.0446971	1294.84	47.5052	4877.88	82.1869	73.4549
129	M	YK1711-1a - 39	51.4151	39.0426	0.759362	86.2032	4.41877	0.188173	0.782089	0.0465252	1315.12	50.6618	4888.82	84.8525	73.0995
130	M	YK1711-1a - 31	66.3725	29.921	0.450805	86.609	4.28875	0.174166	0.784156	0.0448284	1351.08	49.5002	4892.59	81.5283	72.3851
131	M	YK1711-1a - 67	71.1682	61.4717	0.863752	86.7921	4.22988	0.170623	0.776879	0.0439234	1368.02	49.7217	4879.29	80.6796	71.9626
132	M	YK1711-1a - 56	78.9221	63.2796	0.801799	86.8027	4.22686	0.172887	0.790895	0.045401	1368.91	50.4464	4904.79	81.8209	72.0904
133	M	YK1711-1a - 20	46.2204	42.5699	0.92102	86.8306	4.21771	0.241327	0.782907	0.0645373	1371.58	70.6945	4890.31	117.572	71.9531
134	M	YK1711-1a - 2	72.1396	54.5407	0.756044	86.8797	4.20163	0.171084	0.771015	0.0447057	1376.31	50.4638	4868.47	82.7821	71.7302
135	M	YK1711-1a - 10	54.6848	35.9346	0.657122	87.8165	3.90226	0.168291	0.803619	0.0481385	1470.69	56.7124	4927.52	85.2932	70.1536
136	M	YK1711-1a - 38	66.548	37.216	0.559236	88.0533	3.82582	0.154208	0.783379	0.0441997	1496.91	53.8443	4891.17	80.47	69.3957
137	M	YK1711-1a - 16	64.403	44.3559	0.688724	88.1403	3.79827	0.183087	0.795304	0.0560563	1506.59	64.7622	4912.71	100.428	69.3328
138	M	YK1711-1a - 40	40.828	27.7557	0.679821	88.3514	3.73028	0.163212	0.783549	0.0492884	1531.03	59.6285	4891.48	89.7137	68.7001
139	M	YK1711-1a - 12	47.9725	25.0142	0.521427	88.7975	3.58788	0.148233	0.804746	0.0473117	1584.89	58.0528	4929.52	83.7034	67.8489
140	M	YK1711-1a - 44	43.7652	21.251	0.485568	88.8808	3.56137	0.169787	0.811345	0.0578045	1595.35	67.3793	4941.14	101.383	67.713
141	M	YK1711-1a - 36	42.7603	21.277	0.497588	88.9464	3.54041	0.157846	0.813848	0.0510762	1603.7	63.3018	4945.53	89.289	67.5726
142	M	YK1711-1a - 52	31.1182	12.6862	0.407677	89.1541	3.47372	0.171639	0.809543	0.0566107	1630.91	71.2013	4937.98	99.5239	66.9722
143	M	YK1711-1a - 17	59.2235	50.1584	0.846934	89.654	3.31318	0.135503	0.79782	0.0462492	1700.35	61.1278	4917.21	82.5798	65.4204
144	M	YK1711-1a - 23	45.6634	38.5738	0.844743	89.7653	3.2779	0.139753	0.811507	0.0486392	1716.42	64.2492	4941.43	85.2896	65.2648
145	M	YK1711-1a - 62	53.4089	93.9046	1.75822	90.2712	3.11607	0.15632	0.823762	0.0614325	1794.21	78.5712	4962.75	106.02	63.8465
146	M	YK1711-1a - 50	29.8654	12.8156	0.429112	90.8565	2.92836	0.141146	0.819352	0.056057	1893.82	79.0992	4955.11	97.2963	61.7804
147	M	YK1711-1a - 6	19.9911	6.74028	0.337164	91.3396	2.77377	0.185776	0.827305	0.0819463	1984.64	114.422	4968.85	140.778	60.0583
148	M	YK1711-1a - 5	28.8585	13.3832	0.463753	91.8144	2.62156	0.144438	0.826718	0.0650825	2083.06	98.079	4967.84	111.892	58.069
149	M	YK1711-1a - 61	56.1366	77.3129	1.37723	92.3162	2.46071	0.097128	0.825507	0.0460482	2198.38	73.5286	4965.75	79.2909	55.7291
150	M	YK1711-1a - 13	19.2032	19.1178	0.995554	92.9931	2.24449	0.10717	0.855073	0.0560786	2375.37	94.8769	5015.72	93.0187	52.6414
151	M	YK1711-1a - 4	10.2802	1.38039	0.134276	96.8009	1.02475	0.0459495	0.879552	0.0550546	4389.98	142.784	5055.72	88.625	13.168
152	M	YK1711-1a - 19	6.59221	1.40746	0.213503	97.423	0.82522	0.0400443	0.872859	0.0583805	5117.2	171.426	5044.9	94.7437	-1.43315
153	M	YK1711-1a - 26	4.90011	1.31341	0.268036	98.4237	0.50494	0.0336215	0.907944	0.0858825	7039.92	285.403	5100.66	133.67	-38.0199
154	M	YK1711-1a - 49	3.47354	0.72348	0.208283	98.5803	0.45453	0.0254978	0.881431	0.06837	7498.3	248.743	5058.74	109.811	-48.2247
155	M	YK1711-1a - 48	4.09819	0.952763	0.232484	98.8126	0.380403	0.0180904	0.894796	0.059846	8308.78	222.171	5080.03	94.598	-63.5575
156	M	YK1711-1a - 51	2.02685	0.501507	0.247432	99.2182	0.250003	0.0138566	0.883226	0.0705103	10375	286.025	5061.62	113.004	-104.975
157	M	YK1711-1a - 29	1.79482	0.366808	0.20437	99.2944	0.225068	0.0138692	0.877583	0.0775844	10922.5	324.536	5052.54	125.19	-116.178
158	M	YK1711-1a - 60	2.35009	0.295132	0.125583	99.3589	0.205299	0.010638	0.892362	0.0660932	11410.3	277.309	5076.18	104.775	-124.78
159	M	YK1711-1a - 21	1.11786	0.153974	0.13774	99.5233	0.151134	0.0265527	0.876732	0.217271	13088.4	991.617	5051.17	350.948	-159.116
160	M	YK1711-1a - 18	1.15497	0.248708	0.215338	99.5989	0.128385	0.0275624	0.893303	0.273437	14011.4	1241.62	5077.67	432.986	-175.941
161	M	YK1711-1a - 43	0.653175	0.12604	0.192966	99.6514	0.111534	0.0120347	0.904577	0.139723	14821.4	627.764	5095.41	218.328	-190.878
162	M	YK1711-1a - 32	0.448983	0.0416188	0.0926957	99.801	0.0621817	0.0070444	0.912725	0.146778	18295	690.17	5108.08	227.182	-258.159
163	I	YK1711-1a - 30	81.4108	75.8891	0.932175	83.0329	5.43373	0.221163	0.74075	0.0428181	1088.98	40.7826	4811.22	82.7449	77.3658
164	I	YK1711-1a - 65	70.8914	82.8862	1.1692	83.2594	5.36146	0.216996	0.753073	0.0441183	1102.48	41.0143	4834.83	83.7705	77.1972
165	I	YK1711-1a - 45	68.8778	72.805	1.05702	86.7375	4.24734	0.170144	0.776307	0.0444665	1362.95	49.2139	4878.23	81.7414	72.0605
Phengite gneiss YK1711-1b
166	M	YK1711-1b - 41	20.7323	38.659	1.86467	83.3672	5.32645	0.255878	0.737146	0.050422	1109.13	48.9511	4804.24	97.9475	76.9135
167	M	YK1711-1b - 44	25.5182	13.3466	0.523022	84.4197	4.99006	0.244208	0.770745	0.0538514	1177.46	52.6685	4867.97	99.7544	75.8121
168	M	YK1711-1b - 11	8.01883	3.11619	0.388609	85.839	4.5355	0.303183	0.782118	0.0745637	1284.43	77.8505	4888.87	135.984	73.7276
169	M	YK1711-1b - 66	22.3118	43.2806	1.93981	86.9994	4.16383	0.19089	0.791206	0.0523188	1387.55	57.233	4905.35	94.2487	71.7136
170	M	YK1711-1b - 50	23.271	8.36888	0.359626	87.6386	3.95939	0.179124	0.8092	0.0516197	1451.68	58.8067	4937.38	90.7904	70.5981
171	M	YK1711-1b - 52	20.2283	2.99367	0.147994	88.3709	3.72515	0.211538	0.828337	0.0670676	1532.91	77.476	4970.62	115.065	69.1607
172	M	YK1711-1b - 57	17.1559	30.6346	1.78566	88.62	3.64523	0.162255	0.824504	0.0545781	1562.75	61.773	4964.03	94.1002	68.5185
173	M	YK1711-1b - 53	18.0871	31.7425	1.75498	88.9644	3.53497	0.163546	0.829893	0.0530357	1605.89	65.7677	4973.28	90.8098	67.7096
174	M	YK1711-1b - 54	29.0361	60.9108	2.09776	89.2733	3.43582	0.143989	0.82221	0.0489517	1646.78	60.9054	4960.06	84.65	66.7992
175	M	YK1711-1b - 51	24.6132	23.3905	0.950324	89.6158	3.32564	0.135947	0.805778	0.0478849	1694.75	60.9219	4931.34	84.6021	65.6331
176	M	YK1711-1b - 49	17.4013	73.843	4.24353	90.0121	3.19922	0.144813	0.828861	0.0528251	1753.37	69.4911	4971.52	90.569	64.7317
177	M	YK1711-1b - 37	21.6464	28.3451	1.30946	90.2724	3.1158	0.135999	0.828518	0.05011	1794.34	68.3673	4970.93	85.9517	63.9032
178	M	YK1711-1b - 2	23.0176	19.203	0.834277	90.6123	3.00694	0.126219	0.831596	0.0504331	1850.8	67.5338	4976.2	86.1656	62.807
179	M	YK1711-1b - 8	20.4329	27.0466	1.32368	90.8513	2.93061	0.129056	0.844272	0.0517169	1892.57	72.2267	4997.68	86.9501	62.1311
180	M	YK1711-1b - 33	25.4252	18.3426	0.721433	90.9613	2.8943	0.121377	0.803242	0.0489447	1913.1	69.4219	4926.86	86.7651	61.1699
181	M	YK1711-1b - 62	18.782	35.6934	1.90041	90.9902	2.88562	0.141284	0.822594	0.0590339	1918.08	81.2331	4960.73	102.034	61.3347
182	M	YK1711-1b - 23	16.7545	21.592	1.28873	91.0327	2.87226	0.134423	0.833143	0.0535755	1925.8	77.9155	4978.84	91.3538	61.3204
183	M	YK1711-1b - 4	22.1928	35.5998	1.60411	91.0341	2.87131	0.134194	0.814255	0.0537562	1926.35	77.8275	4946.24	93.9241	61.0543
184	M	YK1711-1b - 36	24.574	17.5885	0.715738	91.27	2.79624	0.11732	0.834834	0.0522561	1970.9	71.2495	4981.72	88.9122	60.4374
185	M	YK1711-1b - 45	8.67832	33.4488	3.85429	91.5443	2.70841	0.129197	0.837765	0.0594044	2025.73	82.9268	4986.7	100.699	59.3773
186	M	YK1711-1b - 12	8.12612	28.0829	3.45588	91.5816	2.69648	0.1372	0.839093	0.0631646	2033.42	88.7388	4988.95	106.893	59.2415
187	M	YK1711-1b - 17	20.7089	42.0893	2.03243	91.8824	2.5995	0.113544	0.817296	0.0505575	2098.15	78.2301	4951.54	87.9857	57.6263
188	M	YK1711-1b - 19	18.8948	31.3789	1.66072	92.2407	2.48546	0.105874	0.84846	0.0513852	2179.8	78.7882	5004.7	85.9396	56.4449
189	M	YK1711-1b - 6	22.1484	58.9095	2.65976	92.5201	2.39582	0.0989735	0.843269	0.0501276	2248.64	78.4259	4995.99	84.3845	54.9912
190	M	YK1711-1b - 22	17.1646	54.6344	3.18298	92.6648	2.34972	0.109942	0.856974	0.0567818	2285.78	90.0507	5018.87	93.9633	54.4564
191	M	YK1711-1b - 64	17.3916	7.08482	0.407371	92.8426	2.2921	0.109159	0.83033	0.0559317	2333.97	93.2613	4974.03	95.7149	53.0768
192	M	YK1711-1b - 3	12.9561	24.5611	1.89571	92.8472	2.29073	0.105166	0.833536	0.0523144	2335.14	89.9407	4979.51	89.1587	53.105
193	M	YK1711-1b - 43	19.4638	62.5408	3.21318	92.9395	2.26149	0.0957789	0.8475	0.0504309	2360.42	83.7147	5003.1	84.4449	52.8208
194	M	YK1711-1b - 29	15.6255	12.6564	0.809984	93.0118	2.23842	0.0928936	0.850919	0.0524667	2380.76	82.614	5008.81	87.4789	52.4685
195	M	YK1711-1b - 5	16.2597	48.6141	2.98986	93.432	2.10373	0.0958217	0.849459	0.0540582	2506.96	94.6107	5006.37	90.297	49.9245
196	M	YK1711-1b - 9	13.5503	4.56517	0.336906	93.4341	2.10344	0.0935435	0.870041	0.0536551	2507.25	92.3825	5040.32	87.3743	50.2561
197	M	YK1711-1b - 15	16.3027	28.5343	1.75028	93.7408	2.00502	0.0974519	0.861769	0.0593887	2608.41	104.275	5026.78	97.6969	48.1097
198	M	YK1711-1b - 28	22.0611	39.0635	1.7707	93.7863	1.99038	0.0898692	0.858871	0.0540578	2624.18	97.3421	5022	89.246	47.7464
199	M	YK1711-1b - 30	9.30521	38.0815	4.09249	93.9048	1.95279	0.0886645	0.891031	0.0592506	2665.54	99.1321	5074.07	94.0765	47.4675
200	M	YK1711-1b - 69	12.1178	1.64375	0.135648	94.3213	1.81926	0.0828769	0.877986	0.055661	2823.82	104.174	5053.19	89.7707	44.1182
201	M	YK1711-1b - 13	15.7895	49.2214	3.11735	94.7093	1.69466	0.0715869	0.862386	0.0526306	2989.78	101.065	5027.79	86.5138	40.535
202	M	YK1711-1b - 42	9.50969	0.770622	0.0810354	95.05	1.58572	0.0726781	0.872982	0.0568578	3152.08	114.277	5045.1	92.2588	37.522
203	M	YK1711-1b - 58	8.40423	0.833199	0.0991404	95.1436	1.55524	0.0877552	0.85236	0.0672546	3200.76	142.375	5011.21	111.934	36.1281
204	M	YK1711-1b - 70	13.1165	21.126	1.61064	95.1896	1.54102	0.0870729	0.874877	0.0725993	3223.99	143.37	5048.17	117.53	36.1354
205	M	YK1711-1b - 31	9.83956	26.1459	2.65723	95.2071	1.53543	0.0719805	0.877737	0.0604544	3233.22	119.207	5052.79	97.5309	36.0112
206	M	YK1711-1b - 26	5.16847	15.2659	2.95366	95.5195	1.43526	0.0709811	0.87311	0.0612834	3408.27	130.932	5045.31	99.4243	32.4468
207	M	YK1711-1b - 34	8.0507	20.82	2.58611	96.3828	1.15869	0.0540887	0.876836	0.0559602	4011.04	139.423	5051.34	90.3789	20.5946
208	M	YK1711-1b - 14	4.11001	0.148512	0.0361342	96.6015	1.08822	0.0554162	0.862395	0.0624203	4201.58	157.235	5027.81	102.605	16.4333
209	M	YK1711-1b - 60	7.66814	1.50434	0.19618	96.9718	0.968885	0.0479399	0.848578	0.0601588	4571	162.037	5004.9	100.598	8.66946
210	M	YK1711-1b - 10	6.57028	0.602013	0.0916267	97.1638	0.908467	0.0464818	0.879703	0.0623266	4785.15	172.867	5055.96	100.313	5.35619
211	M	YK1711-1b - 24	6.33651	4.69043	0.740223	97.2687	0.875024	0.0484149	0.890666	0.0726456	4912.98	190.281	5073.49	115.395	3.16377
212	M	YK1711-1b - 18	1.39683	0.428869	0.307029	99.4901	0.163317	0.0299797	0.894798	0.223991	12656.5	1025.79	5080.04	354.059	-149.141
Leucogranite YK192-1a
213	M	YK192-1a - 61	98.3842	132.144	1.34315	66.328	10.7841	0.681136	0.607569	0.0633037	571.657	34.5522	4525.55	151.249	87.3682
214	M	YK192-1a - 9	47.8229	36.5068	0.763375	78.9428	6.7437	0.33392	0.707252	0.0501503	891.351	41.2211	4744.88	101.823	81.2144
215	M	YK192-1a - 39	31.7589	31.3019	0.985609	83.8657	5.16785	0.326144	0.780593	0.0728655	1140.33	65.9627	4886.09	133.163	76.6617
216	M	YK192-1a - 29	75.2097	88.4598	1.17617	85.0832	4.77729	0.187877	0.766292	0.0434329	1225.21	43.8827	4859.7	80.9534	74.7883
217	M	YK192-1a - 54	47.7792	51.7093	1.08226	85.207	4.73795	0.252287	0.778898	0.0634764	1234.47	59.8243	4882.99	116.273	74.7189
218	M	YK192-1a - 77	82.8627	94.5474	1.14101	85.8426	4.53382	0.182824	0.763609	0.0433191	1284.86	46.9754	4854.69	81.0437	73.5337
219	M	YK192-1a - 22	32.6759	39.7155	1.21544	87.8802	3.88184	0.226282	0.802742	0.0670434	1477.6	76.9782	4925.97	118.928	70.0039
220	M	YK192-1a - 69	55.2203	60.705	1.09932	88.5009	3.68329	0.151039	0.81944	0.0473932	1548.39	56.4457	4955.27	82.2494	68.7526
221	M	YK192-1a - 79	52.8663	51.1465	0.96747	88.502	3.68222	0.1653	0.790651	0.0503267	1548.79	61.8076	4904.35	90.7278	68.42
222	M	YK192-1a - 41	28.9461	18.7935	0.649257	91.7796	2.63299	0.112668	0.837833	0.0512127	2075.33	75.9321	4986.81	86.8055	58.3836
223	M	YK192-1a - 64	24.0577	9.13467	0.379699	92.688	2.34219	0.104126	0.85073	0.052909	2291.96	85.7536	5008.5	88.2372	54.2385
224	M	YK192-1a - 38	28.5229	23.1909	0.813063	93.1887	2.18186	0.0988345	0.857779	0.0537924	2432.15	91.7797	5020.2	88.9277	51.5527
225	M	YK192-1a - 13	11.6978	9.36066	0.800206	93.6089	2.04738	0.118587	0.867492	0.074552	2563.88	122.542	5036.16	121.782	49.0907
226	M	YK192-1a - 11	23.8318	18.8459	0.790789	95.2526	1.52062	0.0687784	0.864671	0.0566498	3257.94	115.689	5031.55	92.8593	35.2498
227	M	YK192-1a - 12	21.5158	15.8252	0.735514	95.7383	1.36489	0.0995532	0.86218	0.089902	3543.32	198.885	5027.46	147.818	29.5206
228	M	YK192-1a - 63	4.14398	1.55385	0.374967	97.9828	0.646267	0.0348937	0.892467	0.0656133	6027.74	211.499	5076.35	104.001	-18.7417
229	M	YK192-1a - 74	5.13248	0.98824	0.192546	97.9859	0.645255	0.0421584	0.904134	0.0815562	6033.88	256.134	5094.71	127.504	-18.4341
230	M	YK192-1a - 32	7.30094	1.80728	0.247541	98.3632	0.524315	0.0256923	0.888087	0.0611056	6879.67	207.303	5069.39	97.3631	-35.7101
231	M	YK192-1a - 53	5.76376	0.537739	0.0932966	98.6046	0.445834	0.0220694	0.865389	0.059252	7584.18	220.794	5032.72	97.0392	-50.6973
232	M	YK192-1a - 68	5.1432	1.00603	0.195604	98.6504	0.432167	0.0233148	0.912568	0.0714651	7723.66	242.946	5107.83	110.634	-51.212
233	M	YK192-1a - 17	3.17937	0.36316	0.114224	98.8138	0.380006	0.0221869	0.902619	0.0718479	8313.65	272.899	5092.34	112.526	-63.258
234	M	YK192-1a - 18	4.84154	0.581727	0.120153	98.8249	0.376306	0.0207297	0.886655	0.067746	8359.42	258.158	5067.1	108.129	-64.9743
235	M	YK192-1a - 40	3.64077	0.491749	0.135067	98.8448	0.370056	0.0203524	0.904525	0.0692164	8438.05	258.917	5095.32	108.162	-65.6038
236	M	YK192-1a - 60	4.41622	0.841955	0.190651	98.9459	0.337096	0.0386515	0.878023	0.14048	8882.44	554.162	5053.25	226.558	-75.7766
237	M	YK192-1a - 42	4.31539	0.511038	0.118422	98.9716	0.3292	0.020134	0.884902	0.0753847	8997.05	296.829	5064.3	120.573	-77.6564
238	M	YK192-1a - 37	1.94733	0.515013	0.264472	98.9928	0.322671	0.0180853	0.896004	0.0735289	9094.45	273.334	5081.94	116.06	-78.9562
239	M	YK192-1a - 52	3.93207	0.344703	0.0876644	99.0961	0.289602	0.0136635	0.897703	0.0590752	9628.24	235.948	5084.62	93.0591	-89.36
240	M	YK192-1a - 70	2.26134	0.274956	0.12159	99.1613	0.266921	0.0149524	0.929541	0.0738658	10039.6	285.22	5133.85	112.139	-95.5566
241	M	YK192-1a - 5	3.36014	0.319028	0.0949448	99.2024	0.255094	0.0204157	0.883807	0.0994841	10271.3	411.618	5062.55	159.328	-102.888
242	M	YK192-1a - 55	2.41629	0.303799	0.12573	99.2667	0.234688	0.0118249	0.909456	0.0687179	10703.1	263.212	5103.01	106.766	-109.741
243	M	YK192-1a - 33	1.48673	0.180134	0.121161	99.4297	0.181219	0.0137279	0.875373	0.0932534	12084.4	413.984	5048.97	150.877	-139.344
244	M	YK192-1a - 2	1.3704	0.399469	0.291498	99.6003	0.125943	0.00795689	0.921911	0.0841545	14121.2	362.099	5122.22	128.879	-175.685
245	M	YK192-1a - 21	0.40432	0.269448	0.666424	99.8785	0.0388464	0.00793419	0.901413	0.258612	21184.5	1284.13	5090.45	405.605	-316.162
246	I	YK192-1a - 8	127.038	177.098	1.39406	56.7902	13.8394	0.568303	0.548733	0.0335263	449.742	17.8388	4377.12	89.3873	89.7252
247	I	YK192-1a - 56	111.6	147.935	1.32559	62.1934	12.109	0.517127	0.599349	0.0373557	511.523	21.0009	4505.77	90.569	88.6474
248	I	YK192-1a - 71	88.3057	141.765	1.60539	64.0763	11.5057	0.497133	0.604992	0.0373776	537.256	22.2726	4519.38	89.714	88.1122
249	I	YK192-1a - 66	114.817	150.199	1.30816	64.1087	11.4954	0.49457	0.60706	0.0383735	537.72	22.196	4524.33	91.7672	88.1149
250	I	YK192-1a - 1	105.916	141.6	1.3369	65.9419	10.908	0.463161	0.613959	0.0380208	565.439	22.9861	4540.73	89.8267	87.5474
251	I	YK192-1a - 57	100.288	148.533	1.48107	71.3498	9.1762	0.387496	0.666959	0.0400915	666.807	26.7509	4660.47	86.6708	85.6923
252	I	YK192-1a - 75	92.039	121.118	1.31595	71.9384	8.98796	0.379621	0.683791	0.0404566	680.061	27.2604	4696.38	85.158	85.5195
253	I	YK192-1a - 35	89.7602	110.624	1.23244	72.3904	8.84271	0.453115	0.667876	0.0510522	690.654	33.5607	4662.46	110.204	85.1869
254	I	YK192-1a - 59	74.7756	100.905	1.34943	76.402	7.55835	0.308454	0.719973	0.0435714	800.996	30.7394	4770.46	86.7965	83.2093
255	I	YK192-1a - 25	67.6448	79.3163	1.17254	77.6692	7.15204	0.300193	0.711959	0.041523	843.645	33.1914	4754.4	83.7108	82.2555
256	I	YK192-1a - 80	61.9841	69.1896	1.11625	78.2558	6.96472	0.288556	0.739326	0.0430061	864.879	33.5334	4808.47	83.279	82.0134
257	I	YK192-1a - 51	105.606	137.634	1.30329	78.793	6.79221	0.290468	0.724814	0.0438123	885.403	35.3793	4780.07	86.6542	81.4772
258	I	YK192-1a - 43	71.0103	84.4775	1.18965	78.8861	6.76244	0.304568	0.728304	0.0468208	889.044	37.4029	4786.95	92.131	81.4278
259	I	YK192-1a - 48	81.6292	117.203	1.4358	79.0545	6.70809	0.272326	0.713859	0.0425419	895.769	33.952	4758.22	85.5212	81.1743
260	I	YK192-1a - 3	77.5323	87.4691	1.12816	79.1578	6.67547	0.277132	0.732482	0.0431754	899.854	34.8675	4795.15	84.4407	81.2341
261	I	YK192-1a - 50	60.1351	63.9152	1.06286	79.197	6.66262	0.322054	0.720843	0.0469321	901.474	40.666	4772.19	93.3708	81.1099
262	I	YK192-1a - 19	67.559	74.6789	1.10539	80.4211	6.27013	0.282765	0.71509	0.0455492	953.922	39.9881	4760.7	91.3983	79.9626
263	I	YK192-1a - 36	67.4953	78.8965	1.16892	81.056	6.06758	0.25029	0.750185	0.0432322	983.453	37.6252	4829.33	82.4248	79.6358
264	I	YK192-1a - 76	60.4155	66.277	1.09702	81.4597	5.93822	0.28396	0.750943	0.0532028	1003.29	44.4302	4830.78	101.325	79.2312
265	I	YK192-1a - 7	61.6832	67.469	1.0938	81.5591	5.90621	0.245911	0.7447	0.0439521	1008.33	38.8644	4818.84	84.4558	79.0753
266	I	YK192-1a - 28	87.6268	103.01	1.17555	84.0073	5.12211	0.205376	0.765708	0.0434369	1149.66	42.2206	4858.61	81.0268	76.3377
267	I	YK192-1a - 65	61.6454	68.7896	1.11589	84.5624	4.94405	0.212121	0.759742	0.0473077	1187.47	46.5313	4847.43	88.986	75.5031
268	I	YK192-1a - 15	75.0454	121.236	1.6155	86.6697	4.26896	0.175144	0.771789	0.0454568	1356.73	50.1967	4869.9	84.0829	72.1405
269	I	YK192-1a - 20	72.1338	79.0354	1.09568	88.3316	3.73681	0.150225	0.789534	0.0450986	1528.65	54.7122	4902.33	81.4252	68.8179
270	I	YK192-1a - 73	58.3703	55.4708	0.950326	88.5198	3.67664	0.147348	0.795228	0.0461667	1550.88	55.2444	4912.57	82.7184	68.4304
271	I	YK192-1a - 16	65.4287	64.6493	0.988087	89.529	3.35346	0.13627	0.804789	0.0459696	1682.37	60.1734	4929.59	81.3244	65.872
272	I	YK192-1a - 72	39.4477	37.7157	0.956094	89.636	3.31937	0.15102	0.81289	0.0531317	1697.57	67.9039	4943.85	92.9986	65.6631
273	I	YK192-1a - 46	74.5557	92.1578	1.23609	89.8725	3.24326	0.126578	0.801897	0.0449436	1732.49	59.2933	4924.47	79.8145	64.8187
274	I	YK192-1a - 34	61.3927	56.8549	0.926087	89.9389	3.22189	0.126776	0.798393	0.0449573	1742.56	60.0827	4918.23	80.2118	64.5694
275	I	YK192-1a - 67	70.264	78.3232	1.1147	90.44	3.06122	0.120878	0.797784	0.0449474	1822.21	62.6796	4917.14	80.2591	62.9418
276	I	YK192-1a - 4	49.5034	53.5725	1.0822	90.631	3.00075	0.123872	0.822937	0.0479944	1854.12	66.5174	4961.32	82.9166	62.6286
277	I	YK192-1a - 26	82.1303	86.2255	1.04986	91.8033	2.62458	0.103869	0.808768	0.0452685	2081.02	70.389	4936.62	79.665	57.8453
278	I	YK192-1a - 23	38.2276	26.1209	0.683298	92.9184	2.26789	0.097835	0.833078	0.0504207	2354.84	85.1038	4978.73	85.9816	52.7019
279	I	YK192-1a - 62	23.2418	19.5618	0.841663	93.4837	2.08752	0.0988864	0.868264	0.059118	2523.07	98.9116	5037.42	96.4795	49.9135
Phengite gneiss YK192-1b
280	M	YK192-1b - 52	34.558	82.9681	2.40084	93.434	2.10321	0.0887427	0.854768	0.0503753	2507.48	87.6565	5015.21	83.5903	50.0026
281	M	YK192-1b - 33	29.179	24.8737	0.852451	94.2537	1.84049	0.074562	0.853674	0.0487142	2797.39	91.9472	5013.4	80.9439	44.2017
282	M	YK192-1b - 59	27.8729	21.1666	0.759395	94.5632	1.7416	0.0701462	0.868827	0.0495283	2924.98	94.7109	5038.34	80.7738	41.9456
283	M	YK192-1b - 45	30.4594	49.793	1.63473	94.8894	1.63671	0.0657318	0.852695	0.0486706	3073.93	98.196	5011.77	80.9701	38.6657
284	M	YK192-1b - 36	13.591	3.21331	0.236429	95.5363	1.42973	0.0682169	0.866135	0.0592375	3418.51	126.606	5033.94	96.9267	32.0909
285	M	YK192-1b - 48	20.1538	20.8783	1.03595	96.2842	1.19006	0.0482973	0.866537	0.0499216	3931.83	119.472	5034.6	81.6435	21.9038
286	M	YK192-1b - 14	10.9383	5.88043	0.537601	97.6563	0.750823	0.0419578	0.889328	0.0705875	5457.99	205.825	5071.36	112.305	-7.62379
287	M	YK192-1b - 23	10.8106	5.19172	0.480242	97.9572	0.654413	0.0443654	0.888509	0.0866849	5978.81	264.308	5070.06	138.05	-17.9239
288	M	YK192-1b - 47	6.97397	0.785407	0.11262	98.5112	0.476946	0.0208508	0.904243	0.0567122	7286.57	190.869	5094.88	88.6519	-43.0174
289	M	YK192-1b - 26	5.42885	2.07682	0.382553	98.6777	0.423643	0.0278574	0.900957	0.0838138	7813.59	297.965	5089.74	131.523	-53.5165
290	M	YK192-1b - 7	5.06958	0.773534	0.152583	98.9116	0.348667	0.0331816	0.894268	0.122942	8720.42	455.641	5079.2	194.455	-71.6889
291	M	YK192-1b - 20	3.27534	0.145111	0.0443042	99.2153	0.251415	0.012398	0.898414	0.0629967	10346	254.157	5085.74	99.1531	-103.432
292	M	YK192-1b - 58	2.90502	0.172225	0.0592854	99.3562	0.205151	0.0101815	0.92015	0.064668	11414.1	265.621	5119.52	99.2371	-122.953
293	M	YK192-1b - 4	1.57582	0.221341	0.140461	99.5742	0.134869	0.00763438	0.878129	0.0705262	13730.7	321.808	5053.42	113.726	-171.71
294	I	YK192-1b - 2	41.1755	115.332	2.80098	80.4955	6.24695	0.268315	0.739703	0.0460565	957.211	38.2072	4809.2	89.1375	80.0962
295	I	YK192-1b - 10	40.5384	92.735	2.28759	90.6878	2.98287	0.120801	0.837813	0.0490227	1863.77	65.5503	4986.78	83.0956	62.6258
296	I	YK192-1b - 22	35.7947	85.1831	2.37977	91.0117	2.87902	0.119024	0.835405	0.0483936	1921.88	68.7072	4982.69	82.2805	61.4288
297	I	YK192-1b - 24	32.3986	26.0895	0.805267	92.3909	2.43723	0.102771	0.84306	0.0501945	2216.3	79.0868	4995.64	84.5194	55.6353
298	I	YK192-1b - 39	36.3026	88.8819	2.44836	93.2089	2.17526	0.0887124	0.851479	0.048772	2438.3	82.801	5009.74	81.2619	51.3289
299	I	YK192-1b - 15	35.8181	100.545	2.80709	93.3485	2.13022	0.088977	0.839278	0.0491233	2481.08	86.0243	4989.26	83.1118	50.2716
300	I	YK192-1b - 11	29.5984	94.0803	3.17856	93.3894	2.11704	0.090072	0.836995	0.0499296	2493.89	87.9963	4985.39	84.7207	49.976
301	I	YK192-1b - 42				93.3898	2.11693	0.0867381	0.837753	0.0490813	2494	84.7459	4986.68	83.2012	49.9868
302	I	YK192-1b - 6	31.3731	41.043	1.30822	93.6427	2.03574	0.0831321	0.833333	0.0480054	2575.96	86.7212	4979.16	81.8362	48.2652
303	I	YK192-1b - 53	31.67	42.8635	1.35344	94.0643	1.90117	0.0787842	0.853523	0.0498619	2724.55	92.0862	5013.14	82.8666	45.6519
304	I	YK192-1b - 40	33.5702	14.7487	0.439339	94.2567	1.83948	0.0758353	0.852234	0.0493604	2798.63	93.6019	5011	82.1648	44.1503
305	I	YK192-1b - 38				94.2943	1.82755	0.0773398	0.857005	0.0507173	2813.44	96.4884	5018.92	83.9245	43.9433
306	I	YK192-1b - 32	24.6131	59.3308	2.41054	94.5528	1.74473	0.0708375	0.857749	0.0496354	2920.76	95.3639	5020.15	82.0587	41.8194
307	I	YK192-1b - 54	27.4661	37.809	1.37657	94.7131	1.69319	0.0857324	0.851122	0.0603006	2991.86	121.211	5009.15	100.515	40.272
308	I	YK192-1b - 19	32.5409	87.5744	2.69121	94.8137	1.66053	0.06785	0.838387	0.0482056	3038.77	99.0118	4987.75	81.6512	39.0754
309	I	YK192-1b - 50	25.9697	74.3255	2.86201	94.8896	1.63674	0.0662017	0.856237	0.0495612	3073.89	98.895	5017.65	82.0896	38.7385
310	I	YK192-1b - 1	13.3871	4.62327	0.345352	95.2721	1.51459	0.0848087	0.875328	0.0709465	3268.11	143.572	5048.9	114.792	35.2708
311	I	YK192-1b - 41	21.1962	7.03418	0.331861	95.3234	1.49799	0.0624966	0.867172	0.0510653	3296.46	107.676	5035.64	83.449	34.5374
312	I	YK192-1b - 18	21.8023	12.3111	0.56467	95.5212	1.43479	0.0609473	0.876768	0.0529194	3409.13	112.478	5051.23	85.4748	32.5088
313	I	YK192-1b - 5	19.5789	5.76642	0.294522	96.3245	1.17741	0.0522017	0.879397	0.0567386	3963.37	131.278	5055.47	91.3529	21.6024
314	I	YK192-1b - 34	13.331	4.51417	0.338621	96.7524	1.0404	0.0628596	0.885371	0.0752294	4341.93	190.943	5065.05	120.257	14.2766
315	I	YK192-1b - 49	12.5215	2.21247	0.176694	97.0678	0.939069	0.0450031	0.871905	0.0593368	4674.13	159.352	5043.35	96.4074	7.32097
316	I	YK192-1b - 56	10.8062	2.06783	0.191355	97.6743	0.744881	0.0542933	0.879729	0.090881	5487.3	269.441	5056	146.266	-8.53035
317	I	YK192-1b - 31	8.44846	12.8608	1.52226	98.4269	0.503987	0.0247072	0.895004	0.0627704	7048.02	210.2	5080.36	99.1962	-38.7307
318	I	YK192-1b - 9	8.42909	1.28966	0.153002	98.5279	0.471452	0.0490575	0.884821	0.127818	7337.23	456.632	5064.17	204.457	-44.8851
319	I	YK192-1b - 28	6.96448	1.16213	0.166865	98.7818	0.390296	0.0257539	0.898006	0.0836329	8189.31	306.187	5085.1	131.697	-61.0453
320	I	YK192-1b - 25	4.77405	8.68208	1.8186	99.0655	0.299393	0.0142541	0.895306	0.0587989	9462.66	236.304	5080.84	92.8869	-86.242
321	I	YK192-1b - 12	3.80141	0.24018	0.0631817	99.2166	0.250228	0.0180361	0.91835	0.0936845	10370.4	372.065	5116.76	144.063	-102.675
322	I	YK192-1b - 51	2.37089	0.226209	0.0954108	99.5119	0.156391	0.00888295	0.898712	0.0732134	12897.3	316.89	5086.21	115.193	-153.575
323	I	YK192-1b - 16	1.9855	0.479006	0.241252	99.5414	0.146472	0.00788398	0.910324	0.0674293	13264.2	302.876	5104.35	104.658	-159.861
Note: Group I-Core (Igneous); Group M-Rim (Metamorphic).
Complilation of results for U-Pb reference materials
Summary
Standard	Age (Ma)	± 2σ	MSWD	p	n
Mount McClure	515	15	0.75	0.76	20 of 20
Published age	523.5	1.5	Schoene & Bowring (2006)
AS3 (FC-Duluth)	1101	41	1.12	0.32	20 of 20
Published age	1099.1	1.2	Schmitz et al., 2003
Individual Data
Spot	U (ppm)	Th (ppm)	Th/U	238U/206Pb	± 2σ	207Pb/206Pb	± 2σ	206Pb/238U Age (Ma)	± 2σ	207Pb/206Pb Age (Ma)	± 2σ	Disc. (%)
MMc - 1	11.4771	48.173	4.1973	8.88614	0.498799	0.26321	0.0279149	687.452	36.6023	3265.31	166.837	78.9468
MMc - 2	18.9724	98.7731	5.20616	10.8876	0.542491	0.159113	0.0163427	566.456	27.0202	2445.5	173.842	76.8368
MMc - 3	12.1421	56.4729	4.65099	9.93042	0.565778	0.227836	0.0251332	618.514	33.6019	3036.19	176.784	79.6286
MMc - 4	11.2219	45.5758	4.06133	9.65498	0.548234	0.226655	0.0227282	635.317	34.3545	3027.85	160.813	79.0176
MMc - 5	9.52418	36.0519	3.78531	8.54603	0.438383	0.283249	0.0268597	713.351	34.6409	3380.23	147.868	78.8964
MMc - 6	5.59814	23.226	4.14888	7.38967	0.445012	0.387469	0.0400497	818.167	46.273	3860.47	155.89	78.8066
MMc - 7	5.15224	18.8764	3.66372	8.19988	0.623475	0.344722	0.0382973	741.795	53.2793	3683.14	169.527	79.8597
MMc - 8	13.531	76.8134	5.67682	8.70173	0.447712	0.267377	0.0244484	701.256	34.1874	3290	143.567	78.6852
MMc - 9	13.1692	49.9066	3.78966	10.1598	0.531653	0.170874	0.0185263	605.182	30.2277	2565.47	181.33	76.4105
MMc - 10	11.4429	48.7486	4.26017	9.91213	0.53821	0.230819	0.0223086	619.602	32.0772	3057.01	154.618	79.7318
MMc - 11	8.73315	37.8407	4.333	9.13729	0.523255	0.226478	0.0230046	669.505	36.4164	3026.61	162.912	77.8794
MMc - 12	12.0666	49.0229	4.06268	10.1679	0.549865	0.20059	0.022166	604.725	31.2159	2830.27	180.286	78.6337
MMc - 13	8.69229	37.6222	4.32822	9.4842	0.581527	0.240048	0.0246324	646.202	37.7014	3119.57	163.314	79.2856
MMc - 14	9.22434	36.5515	3.9625	9.40536	0.495893	0.254895	0.0271208	651.354	32.6646	3214.72	168.046	79.7384
MMc - 15	6.69156	22.8479	3.41444	8.22205	0.541181	0.313988	0.0344707	739.905	46.0108	3539.94	169.2	79.0984
MMc - 16	11.5568	38.1872	3.30431	9.50927	0.564235	0.210256	0.0245709	644.581	36.3968	2906.79	189.37	77.825
MMc - 17	5.37079	19.1078	3.55774	8.9627	0.604976	0.252881	0.0353963	681.88	43.6764	3202.18	221.29	78.7058
MMc - 18	8.83023	33.1917	3.75887	9.78758	0.583242	0.224814	0.0271954	627.115	35.61	3014.77	194.21	79.1986
MMc - 19	7.56146	24.5509	3.24685	8.48093	0.479841	0.276549	0.0279234	718.532	38.4704	3342.85	157.893	78.5054
MMc - 20	15.9565	83.851	5.25497	10.5233	0.219755	0.155415	0.0073849	585.198	11.6822	2405.61	80.7524	75.6736
Spot	U (ppm)	Th (ppm)	Th/U	238U/206Pb	± 2σ	207Pb/206Pb	± 2σ	206Pb/238U Age (Ma)	± 2σ	207Pb/206Pb Age (Ma)	± 2σ	Disc. (%)
FC1 - 1	4.23795	13.268	3.13075	4.21375	0.258663	0.261286	0.0267395	1372.74	75.902	3253.77	161.134	57.8108
FC1 - 2	4.08557	12.0657	2.95325	4.28728	0.255377	0.271508	0.0309771	1351.5	72.6283	3314.05	178.805	59.2191
FC1 - 3	4.6512	17.4569	3.75321	3.73793	0.205373	0.310612	0.0280671	1528.24	74.7587	3523.27	139.432	56.6244
FC1 - 4	4.55516	18.0526	3.96311	4.43088	0.265017	0.214524	0.0238495	1311.86	70.9985	2939.31	179.644	55.3683
FC1 - 5	4.89558	24.0367	4.90988	4.24117	0.227078	0.292982	0.0276174	1364.74	65.856	3432.81	146.413	60.2442
FC1 - 6	6.48308	21.625	3.33561	4.56645	0.228799	0.210702	0.0198431	1276.53	58.0266	2910.22	152.563	56.1364
FC1 - 7	3.57181	13.796	3.86246	3.83984	0.240201	0.323494	0.0356074	1492.03	83.3244	3585.83	169.095	58.391
FC1 - 8	3.50429	12.0947	3.4514	3.62987	0.217502	0.373977	0.0374814	1568.62	83.4344	3806.93	151.681	58.7957
FC1 - 9	5.97964	19.4871	3.25891	4.1738	0.217919	0.259431	0.0237573	1384.56	65.0558	3242.54	144.314	57.3001
FC1 - 10	5.43287	23.8322	4.38667	4.35201	0.246506	0.29695	0.0302939	1333.34	68.2268	3453.69	158.213	61.3937
FC1 - 11	5.18904	18.7058	3.60487	4.18458	0.229692	0.252795	0.0250363	1381.35	68.2519	3201.64	156.582	56.8549
FC1 - 12	4.40255	15.1052	3.43101	4.06557	0.243874	0.252624	0.026997	1417.65	76.3404	3200.58	168.972	55.7064
FC1 - 14	9.57715	45.7523	4.77724	4.73485	0.229122	0.193865	0.0178978	1235.21	54.3961	2774.49	151.384	55.4799
FC1 - 15	5.90522	22.0453	3.73318	3.91454	0.218936	0.27733	0.0255257	1466.56	73.3653	3347.26	143.881	56.1862
FC1 - 16	4.79566	12.903	2.69056	4.01372	0.230463	0.310545	0.0299604	1434.07	73.8294	3522.94	148.873	59.2935
FC1 - 17	5.27237	16.7054	3.16847	4.07709	0.235593	0.282176	0.0288998	1414.05	73.3728	3374.31	159.774	58.0936
FC1 - 18	3.69282	12.6242	3.41857	3.80537	0.225117	0.358461	0.0346517	1504.08	79.3644	3742.66	146.92	59.8125
FC1 - 19	4.19263	13.658	3.25761	4.13547	0.254636	0.307921	0.0359853	1396.1	77.2955	3509.84	180.504	60.2232
FC1 - 20	17.5345	76.3498	4.35427	5.15741	0.234554	0.114883	0.00989701	1142.44	47.6144	1877.24	155.268	39.1422
